# Supplementary material
Source: PubMed Central journal article supplement (PMC3061554)
Supplement: NIHMS279146-supplement-Supplementary_Results_and_Data.pdf [file NIHMS279146-supplement-Supplementary_Results_and_Data.pdf]

**Neuron, Volume 59**  
**Supplemental Data**  
**Neural circuitry underlying the regulation of conditioned fear and its relation to extinction**

M.R. Delgado<sup>1</sup>, K.I. Nearing<sup>2</sup>, J.E. LeDoux<sup>3,4</sup>, E.A. Phelps<sup>3,4</sup>

Department of Psychology<sup>1</sup>, Rutgers University, Newark, NJ 07102

University of Miami School of Medicine<sup>2</sup>, Miami, FL 33136

Department of Psychology<sup>3</sup>, New York University, New York, NY 10003

Center for Neural Science<sup>4</sup>, New York University, New York, NY 10003

### **Supplementary Information**

#### Results

Additional analyses were conducted on the emotion regulation of fear ROIs. In the manuscript, we identified our ROIs using a Regulate vs. Attend contrast for CS+ trials only. This was done in order for our analysis of the BOLD data to be analogous to other studies of emotion regulation. We then determined individual subjects' beta weights from these ROIs for additional analyses. Given this, the only aspect of the data that was not examined in the contrast used to define the ROI was the comparison of the CS- trials for both Attend and Regulate, thus a t-test comparing responses to the CS- trials across conditions was performed.

However, additional ANOVAs were conducted in the mean beta weights for both the dlPFC and amygdala. These repeated measures ANOVAs were similar to the SCR analysis with type of trial (Attend, Regulate) and type of stimulus (CS+, CS-) as within-subjects factor. For the dlPFC ROI, no interaction between type of instruction (Attend, Regulate) and type of CS (CS+, CS-) ( $F(1,11)=0.18, p=0.68$ ). Instead, a main effect of type of instruction  $F(1,11)=7.78, p < 0.05$  was observed. For the amygdala the reverse pattern was detected. There is an interaction between

type of instruction and type of CS ( $F(1,11)=6.61, p<0.05$ ). However, there is no main effect of type of instruction ( $F(1,11)=1.47, p = 0.25$ ).

### Additional Table

The ventromedial prefrontal cortex (vmPFC) has been previously linked to extinction of fear (e.g., Milad et al., 2005; Milad and Quirk, 2002; Phelps et al., 2004). Although less frequently emphasized, several of these studies also report activation in regions of foci in the vmPFC (i.e., the subgenual ACC or immediately adjacent vmPFC region) similar to that observed in the present study vmPFC and studies of extinction (Phelps et al., 2004; for review and plots of coordinates of various studies see Ochsner and Gross, 2005). Here, we list some coordinates of other ventromedial PFC findings in emotional regulation tasks for purposes of comparisons with

| <u>Study</u>          | <u>Type of Contrast</u>          | <u>Type of Stimuli</u>  | <u>Brodman Area</u> | <u>Talairach Coordinates</u> |          |          |
|-----------------------|----------------------------------|-------------------------|---------------------|------------------------------|----------|----------|
|                       |                                  |                         |                     | <u>x</u>                     | <u>y</u> | <u>z</u> |
| Delgado et al. 2008   | Regulation > attend              | Aversive CS             | 32                  | 0                            | 35       | -8       |
| Simpson et al., 2001  | Anticipation of shock > baseline | Anticipation of shock   | 25                  | -1                           | 17       | -8       |
| Simpson et al., 2001  | Anticipation of shock > baseline | Anticipation of shock   | 32/10               | 1                            | 41       | -8       |
| Harenski et al., 2006 | Regulate: Moral > Non-moral      | Negative pictures       | 32                  | 3                            | 36       | -3       |
| Eippert et al., 2007  | Up > down regulation (masked)    | Threat related pictures | 24                  | 0                            | 24       | -6       |
| Kim & Hamann, 2007    | Regulate > baseline              | Negative pictures       | 47                  | -48                          | 30       | -9       |
| Ochsner et al., 2002  | Reappraisal > attend             | Negative pictures       | 44/10               | -48                          | 46       | 4        |
| Levesque et al., 2003 | Suppression > baseline           | Sad film excerpts       | 11                  | 24                           | 46       | -17      |

the current data (Delgado et al., 2008; Eippert et al., 2007; Kim and Hamann, 2007; Levesque et al., 2003; Ochsner et al., 2002; Simpson et al., 2001)

## References

- Delgado, M.R., Nearing, K.I., LeDoux, J.E., and Phelps, E.A. (2008). Neural circuitry underlying the regulation of conditioned fear and its relation to extinction. *Neuron*.
- Eippert, F., Veit, R., Weiskopf, N., Erb, M., Birbaumer, N., and Anders, S. (2007). Regulation of emotional responses elicited by threat-related stimuli. *Hum Brain Mapp* 28, 409-423.
- Kim, S.H., and Hamann, S. (2007). Neural correlates of positive and negative emotion regulation. *J Cogn Neurosci* 19, 776-798.
- Levesque, J., Eugene, F., Joanette, Y., Paquette, V., Mensour, B., Beaudoin, G., Leroux, J.M., Bourgouin, P., and Beauregard, M. (2003). Neural circuitry underlying voluntary suppression of sadness. *Biol Psychiatry* 53, 502-510.
- Milad, M.R., Quinn, B.T., Pitman, R.K., Orr, S.P., Fischl, B., and Rauch, S.L. (2005). Thickness of ventromedial prefrontal cortex in humans is correlated with extinction memory. *Proc Natl Acad Sci U S A* 102, 10706-10711.
- Milad, M.R., and Quirk, G.J. (2002). Neurons in medial prefrontal cortex signal memory for fear extinction. *Nature* 420, 70-74.
- Ochsner, K.N., Bunge, S.A., Gross, J.J., and Gabrieli, J.D. (2002). Rethinking feelings: an FMRI study of the cognitive regulation of emotion. *J Cogn Neurosci* 14, 1215-1229.
- Ochsner, K.N., and Gross, J.J. (2005). The cognitive control of emotion. *Trends Cogn Sci* 9, 242-249.
- Phelps, E.A., Delgado, M.R., Nearing, K.I., and LeDoux, J.E. (2004). Extinction learning in humans: role of the amygdala and vmPFC. *Neuron* 43, 897-905.
- Simpson, J.R., Jr., Drevets, W.C., Snyder, A.Z., Gusnard, D.A., and Raichle, M.E. (2001). Emotion-induced changes in human medial prefrontal cortex: II. During anticipatory anxiety. *Proc Natl Acad Sci U S A* 98, 688-693.
